# Supplementary material for: Cross-sectional analysis of US scope of practice laws and employed physician assistants
Source: PubMed Central journal article supplement — BMJ Open. 2021 May 11;11(5):e043972. doi: 10.1136/bmjopen-2020-043972 (PMC8118013; doi:10.1136/bmjopen-2020-043972), 2021-05-11
Supplement: bmjopen-2020-043972supp001.pdf [file bmjopen-2020-043972supp001.pdf]

Supplemental Table 1: Change in State Ratio<sup>a</sup> of Physician Assistants per 100,000 Population per State (1998, 2008, and 2017)

| State                     | 1998 <sup>b</sup><br>Ratio/100,000 Population | 2008<br>Ratio/100,000 Population | 2017 <sup>c</sup><br>Ratio/100,000 Population | Difference in PA ratio<br>(2017 – 1998) |
|---------------------------|-----------------------------------------------|----------------------------------|-----------------------------------------------|-----------------------------------------|
| <b>Super Expanders</b>    |                                               |                                  |                                               |                                         |
| Alaska (AK)               | 26                                            | 42                               | 69                                            | 43                                      |
| Arizona (AZ)              | 56                                            | 22                               | 33                                            | -23                                     |
| Connecticut (CT)          | 31                                            | 36                               | 53                                            | 22                                      |
| Delaware (DE)             | 39                                            | 29                               | 49                                            | 10                                      |
| District of Columbia (DC) | 46                                            | 97                               | 72                                            | 26                                      |
| Georgia (GA)              | 24                                            | 25                               | 37                                            | 13                                      |
| Maine (ME)                | 45                                            | 55                               | 59                                            | 14                                      |
| Maryland (MD)             | 35                                            | 27                               | 50                                            | 15                                      |
| Massachusetts (MA)        | 26                                            | 39                               | 44                                            | 18                                      |
| New York (NY)             | 24                                            | 41                               | 62                                            | 38                                      |
| North Carolina (NC)       | 25                                            | 33                               | 44                                            | 19                                      |
| North Dakota (ND)         | 26                                            | 52                               | 38                                            | 12                                      |
| South Dakota (SD)         | 29                                            | 53                               | 68                                            | 39                                      |
| Utah (UT)                 | 25                                            | 23                               | 38                                            | 13                                      |
| Vermont (VT)              | 47                                            | 29                               | 38                                            | -9                                      |
| West Virginia (WV)        | 39                                            | 35                               | 36                                            | -3                                      |
| Wisconsin (WI)            | 35                                            | 28                               | 33                                            | -2                                      |
| <b>Contractors</b>        |                                               |                                  |                                               |                                         |
| Florida (FL)              | 26                                            | 22                               | 27                                            | 1                                       |
| Hawaii (HI)               | 29                                            | 23                               | 23                                            | -6                                      |
| Idaho (ID)                | 27                                            | 31                               | 31                                            | 4                                       |
| Missouri (MO)             | 23                                            | 11                               | 16                                            | -7                                      |
| New Mexico (NM)           | 25                                            | 34                               | 32                                            | 7                                       |
| Oklahoma (OK)             | 38                                            | 30                               | 32                                            | -6                                      |
| South Carolina (SC)       | 24                                            | 13                               | 26                                            | 2                                       |
| Texas (TX)                | 24                                            | 16                               | 25                                            | 1                                       |
| Washington (WA)           | 27                                            | 28                               | 31                                            | 4                                       |
| <b>Slow Expanders</b>     |                                               |                                  |                                               |                                         |
| Colorado (CO)             | 21                                            | 27                               | 57                                            | 36                                      |
| Iowa (IA)                 | 22                                            | 23                               | 33                                            | 11                                      |
| Kansas (KS)               | 19                                            | 23                               | 33                                            | 14                                      |
| Michigan (MI)             | 21                                            | 30                               | 48                                            | 27                                      |
| Minnesota (MN)            | 19                                            | 25                               | 38                                            | 19                                      |
| Montana (MT)              | 21                                            | 59                               | 54                                            | 33                                      |
| Nebraska (NE)             | 22                                            | 49                               | 61                                            | 39                                      |
| New Hampshire (NH)        | 17                                            | 38                               | 53                                            | 36                                      |
| Pennsylvania (PA)         | 19                                            | 30                               | 48                                            | 29                                      |
| Wyoming (WY)              | 20                                            | 38                               | 38                                            | 18                                      |
| <b>Never Adopters</b>     |                                               |                                  |                                               |                                         |
| Alabama (AL)              | 9                                             | 8                                | 15                                            | 6                                       |
| Arkansas (AR)             | 14                                            | 4                                | 17                                            | 3                                       |
| California (CA)           | 17                                            | 20                               | 28                                            | 11                                      |
| Illinois (IL)             | 18                                            | 20                               | 21                                            | 3                                       |
| Indiana (IN)              | 22                                            | 13                               | 20                                            | -2                                      |
| Kentucky (KY)             | 11                                            | 15                               | 22                                            | 11                                      |
| Louisiana (LA)            | 22                                            | 14                               | 19                                            | -3                                      |
| Mississippi (MS)          | 19                                            | 8                                | 8                                             | -11                                     |
| Nevada (NV)               | 13                                            | 18                               | 19                                            | 6                                       |
| New Jersey (NJ)           | 14                                            | 11                               | 26                                            | 12                                      |
| Ohio (OH)                 | 15                                            | 14                               | 26                                            | 11                                      |
| Oregon (OR)               | 18                                            | 17                               | 30                                            | 12                                      |
| Rhode Island (RI)         | 13                                            | 21                               | 23                                            | 10                                      |
| Tennessee (TN)            | 20                                            | 21                               | 24                                            | 4                                       |
| Virginia (VA)             | 19                                            | 18                               | 31                                            | 12                                      |

**Super Expanders:** At or above 1998 median & at or above 2017 median

**Contractors:** At or above 1998 median & below 2017 median

**Slow Expanders:** Below 1998 median & at or above 2017 median

**Never Adopters:** Below 1998 median & below 2017 median

<sup>a</sup> PA Ratio = (employed PA in year/state population in year) \* 100,000

<sup>b</sup> The median ratio for 1998 was 23 PAs per 100,000 population per state.

<sup>c</sup> The median ratio for 2017 was 33 PAs per 100,000 population per state.
